# Supplementary material
Source: PubMed Central journal article supplement (PMC3339978)

## **SUPPLEMENTARY FIGURE LEGENDS**

**SUPPLEMENTARY FIGURE 1.** OCRL depletion promotes *L. monocytogenes* invasion of HeLa cells (results are represented as % of inoculum). A) Gentamicin invasion assays were performed in HeLa cells as described in Fig. 1B. Values represent the averages  $\pm$  standard error of the mean (SEM) of tetraplicate samples from 3 to 4 independent experiments. B) Scale adjustment for EGD and EGD $\Delta$ InlA results presented in A). C) Scale adjustment for P14 and EGD $\Delta$ InlB results presented in A).

**SUPPLEMENTARY FIGURE 2.** Distribution of endogenous OCRL, GFP-OCRL-a and wheat germ agglutinin (WGA) in cells infected with *L. monocytogenes*. A) Cells were infected for 10 min with *L. monocytogenes* strain P14 and processed for immuno-fluorescence: plasma membrane was labeled with WGA-Alexa-555 (red), endogenous OCRL with specific anti-OCRL antibodies (green) and DNA with Hoechst (blue). B) Cells were transfected with EGFP-OCRL-a for 20 h, infected for 10 min with *L. monocytogenes* strain P14.PrfA\* and processed for immuno-fluorescence: plasma membrane was labeled with WGA-Alexa-555 (red) and *L. monocytogenes* were detected with antibodies against the bacterial cell wall. Arrows indicate regions positive for OCRL alone or in association with membrane enrichment and arrow heads point on regions positive for the membrane marker only. Bar: 10  $\mu$ m (insert bar: 1  $\mu$ m).

**SUPPLEMENTARY FIGURE 3.** Association of EGFP-OCRL-a, PI(4,5)P<sub>2</sub>, PI(3,4,5)P<sub>3</sub>, and actin to wild type *L. monocytogenes* strain P14. A) Cells were transfected with EGFP-OCRL-a, infected for 10 min and processed for differential immunofluorescence where extracellular and total *L. monocytogenes* were labelled with antibodies against the bacterial cell wall envelope. B) Cells were transfected with PH-AKT-citrine, infected for 25min and processed for bacterial labeling as described in A). C) Cells were transfected with PH-PLC $\delta$ -Cherry, infected for 25min and processed for bacterial labeling as described in A). D) Cells were infected for 15 min and processed for immuno-fluorescence, labeling actin with fluorescent phalloidin and bacteria as described in A). Bar: 10  $\mu$ m (insert bar: 1  $\mu$ m).

Supplementary Figure 1

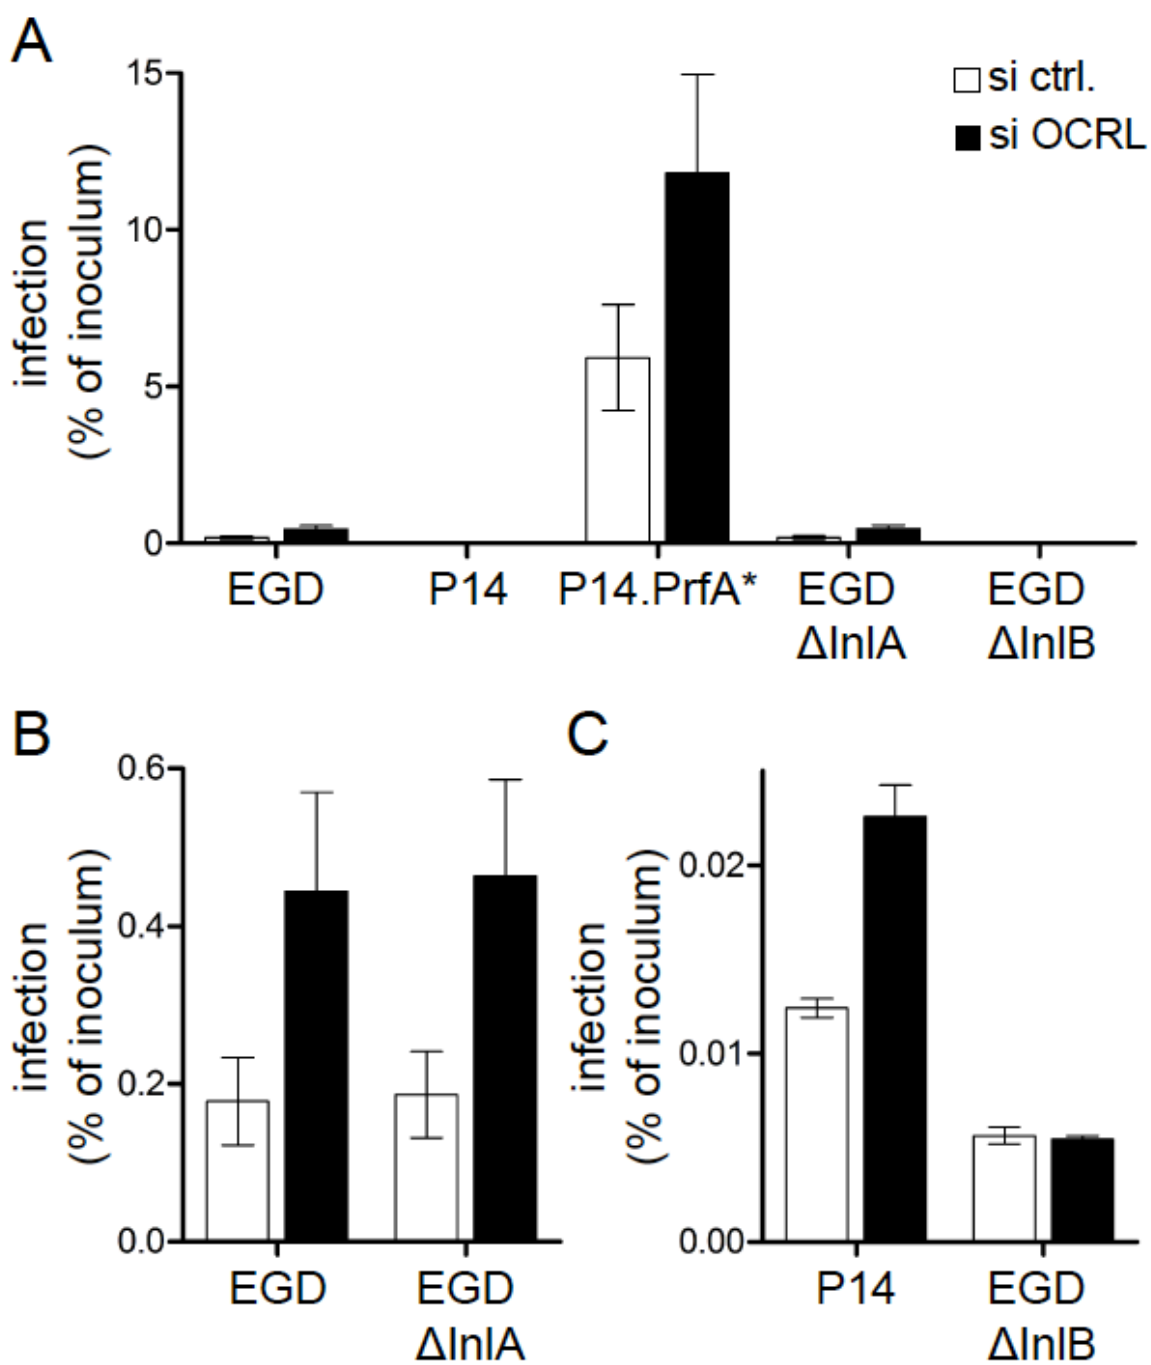

Supplementary Figure 2

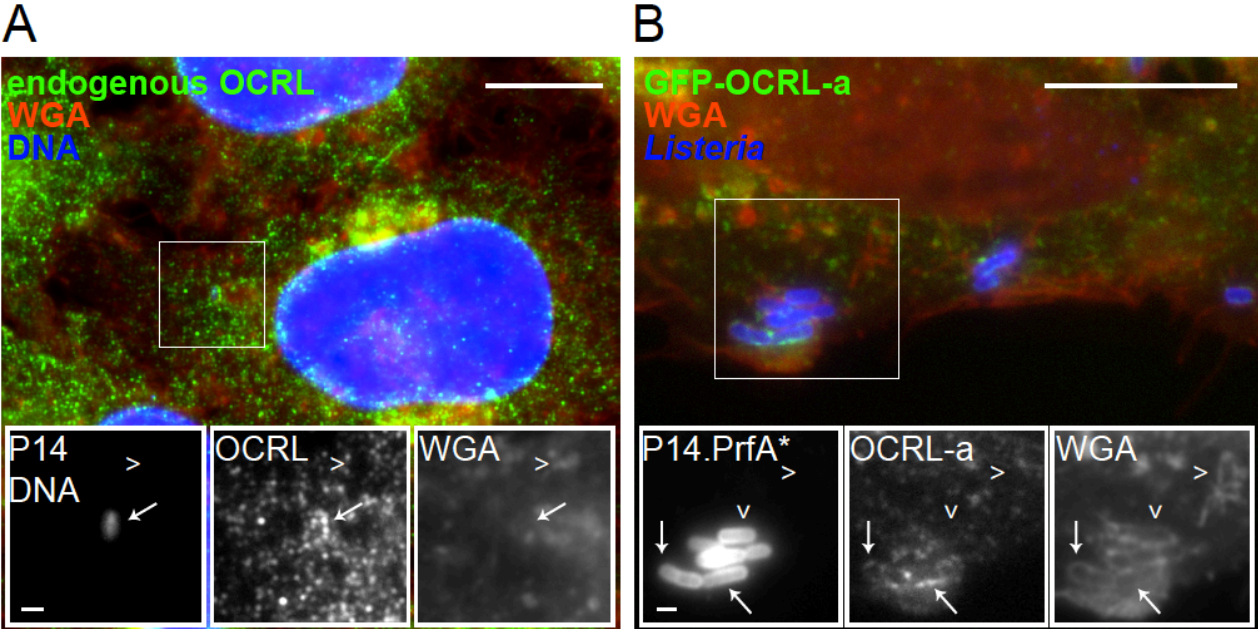

Supplementary Figure 3

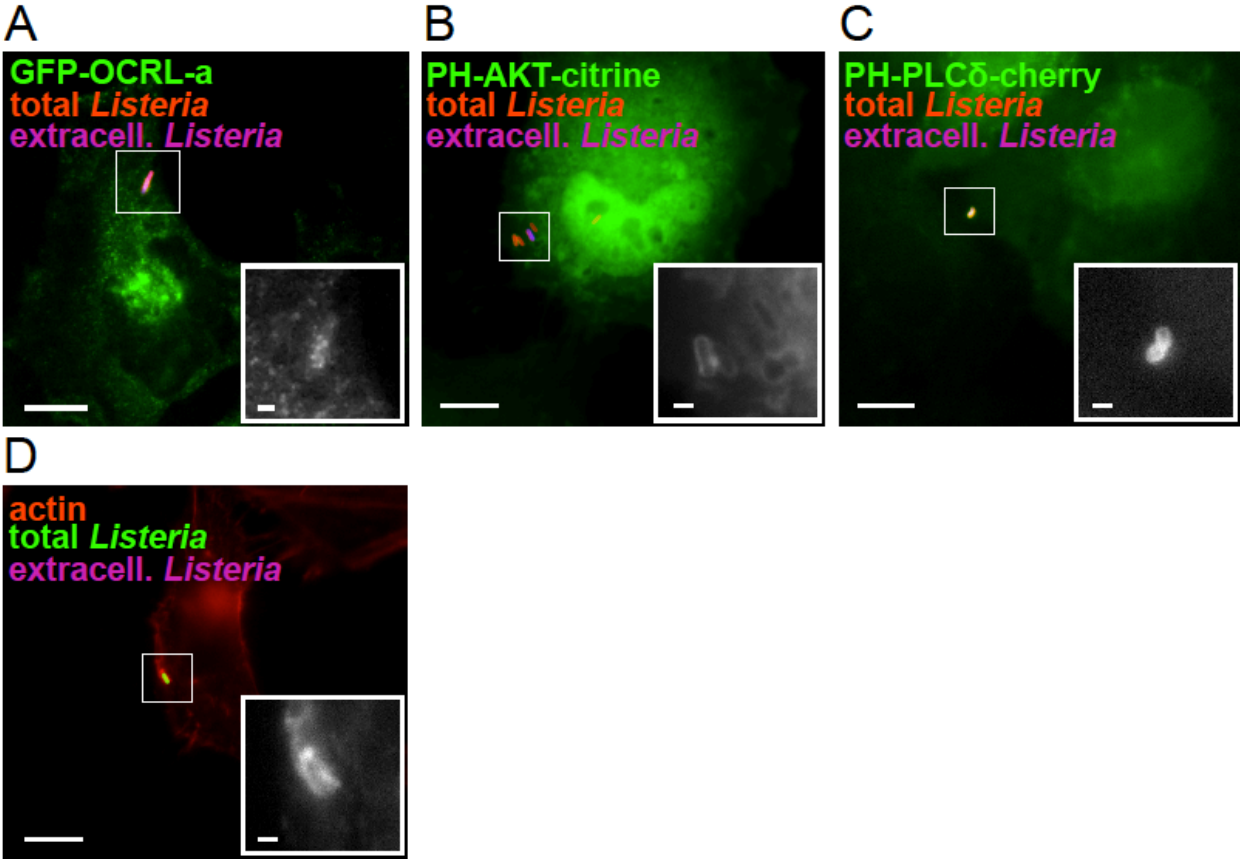

Supplement: supp_M111.315788_jbc.M111.315788-1.pdf [file supp_M111.315788_jbc.M111.315788-1.pdf]
